# Supplementary material
Source: PubMed Central journal article supplement (PMC7433306)
Supplement: NIHMS1604067-supplement-1.pdf [file NIHMS1604067-supplement-1.pdf]

**SUPPLEMENTAL INFORMATION**

**Endolysosomal Targeting of Mitochondria is Integral to BAX-mediated Mitochondrial Permeabilization During Apoptosis Signaling**

Tim Sen Wang, Isabelle Coppens, Anna Saorin, Nathan Ryan Brady and Anne Hamacher-Brady

**Figure S1**

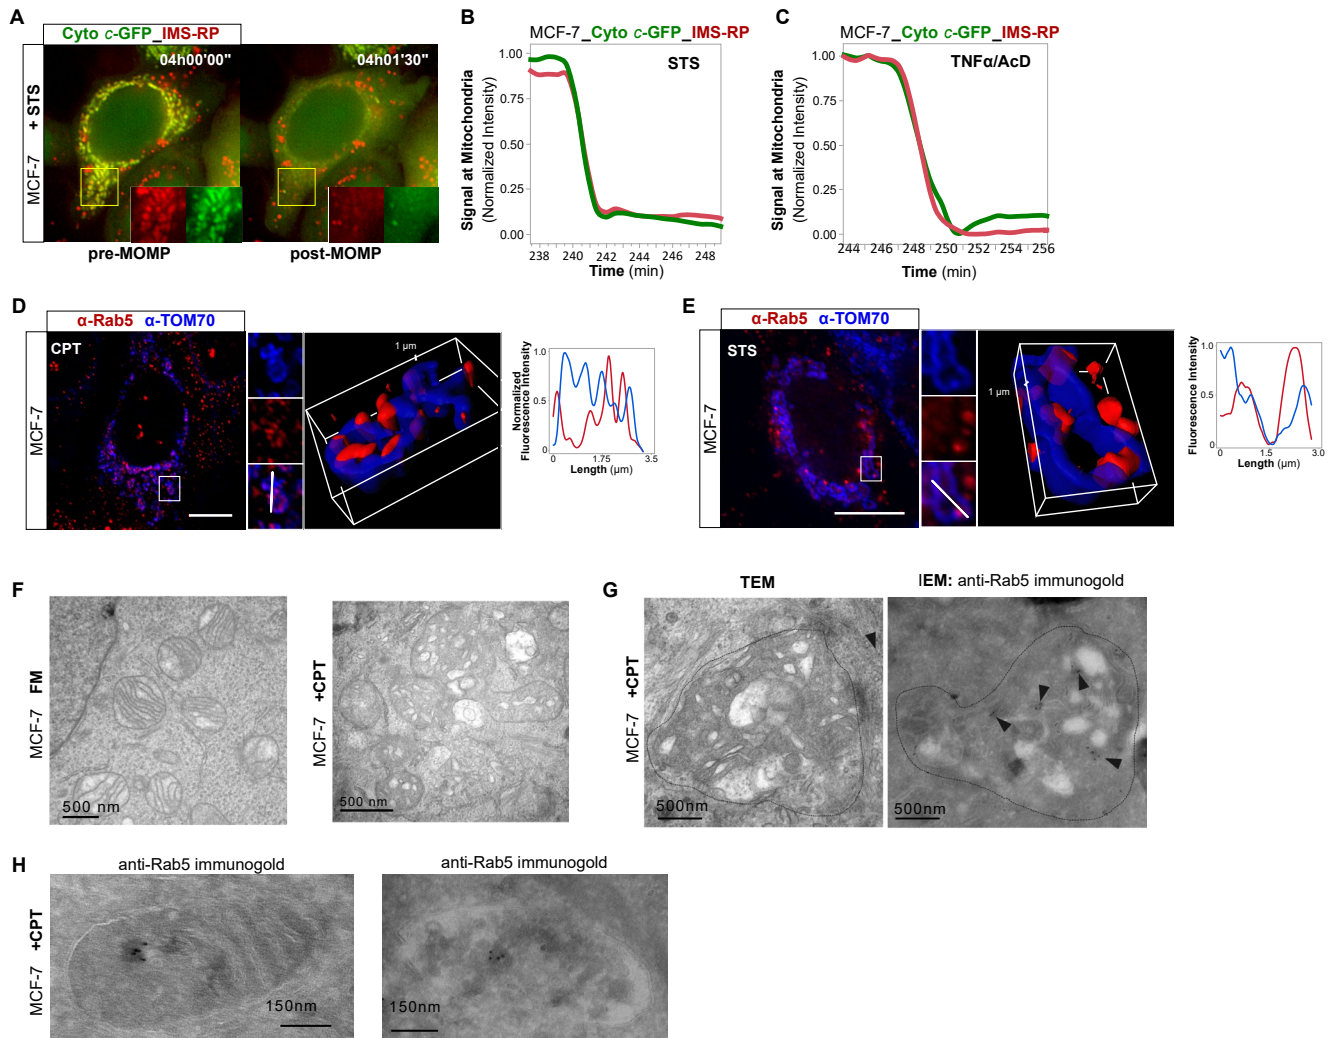

**Figure S1. Rab5+ Early Endosomes Target Mitochondria in Response to Proapoptotic Stimuli, Related to Figure 1**

- (A) Validation of Cyto c-GFP MOMP as MOMP sensor through comparison with IMS-RP release kinetics. MCF-7 cells stably expressing both Cyto c-GFP and IMS-RP, treated with STS for 4 hrs, and *live* imaged at 30 sec intervals. *Left*, representative image, with single-color zooms insets, pre-MOMP. *Right*, representative image, with single-color zooms insets, post-MOMP.
- (B) Graph of mitochondrial Cyto c-GFP (green trace) and IMS-RP (red trace) intensities in MCF-7 cell treated and imaged as in (A).
- (C) Graph of mitochondrial Cyto c-GFP (green trace) and IMS-RP (red trace) intensities in MCF-7 cell treated with TNF/AcD for 4 hrs, and imaged as in (A).

- (D) MCF-7 cells treated with camptothecin (CPT) for 24 hrs, immunostained for Rab5 and TOM70, imaged in 0.2  $\mu\text{m}$  steps. Scale bar, 10  $\mu\text{m}$ . 3D reconstruction of ROI. Intensity profile of line drawn over merged ROI. See also **Movie S2**.
- (E) MCF-7 cells treated with staurosporine (STS) for 4 hrs, immunostained for Rab5 and TOM70, imaged in 0.2  $\mu\text{m}$  steps. Scale bar, 10  $\mu\text{m}$ . 3D reconstruction of ROI. Intensity profile of line drawn over merged ROI. See also **Movie S2**.
- (F) Electron micrographs of MCF-7 cells cultured in FM, or treated with CPT for 24 hrs. Scale bars, 500 nm.
- (G) *Left*, Transmission electron microscopy (TEM) of MCF-7 cells treated with CPT for 24 hrs. Encircled is a large mitochondrion with altered ultrastructure. *Right*, IEM of MCF-7 cells treated with CPT for 24 hrs, immunogold-labeled for Rab5. Encircled is a large mitochondrion with internalized structures identified as Rab5+ vesicles. Scale bars, 500 nm.
- (H) Immunoelectron microscopy (IEM) of MCF-7 cells treated with CPT for 24 hrs, immunogold-labeled for Rab5. Representative mitochondria with internalized Rab5+ vesicle. Scale bars, 150 nm.

Figure S2

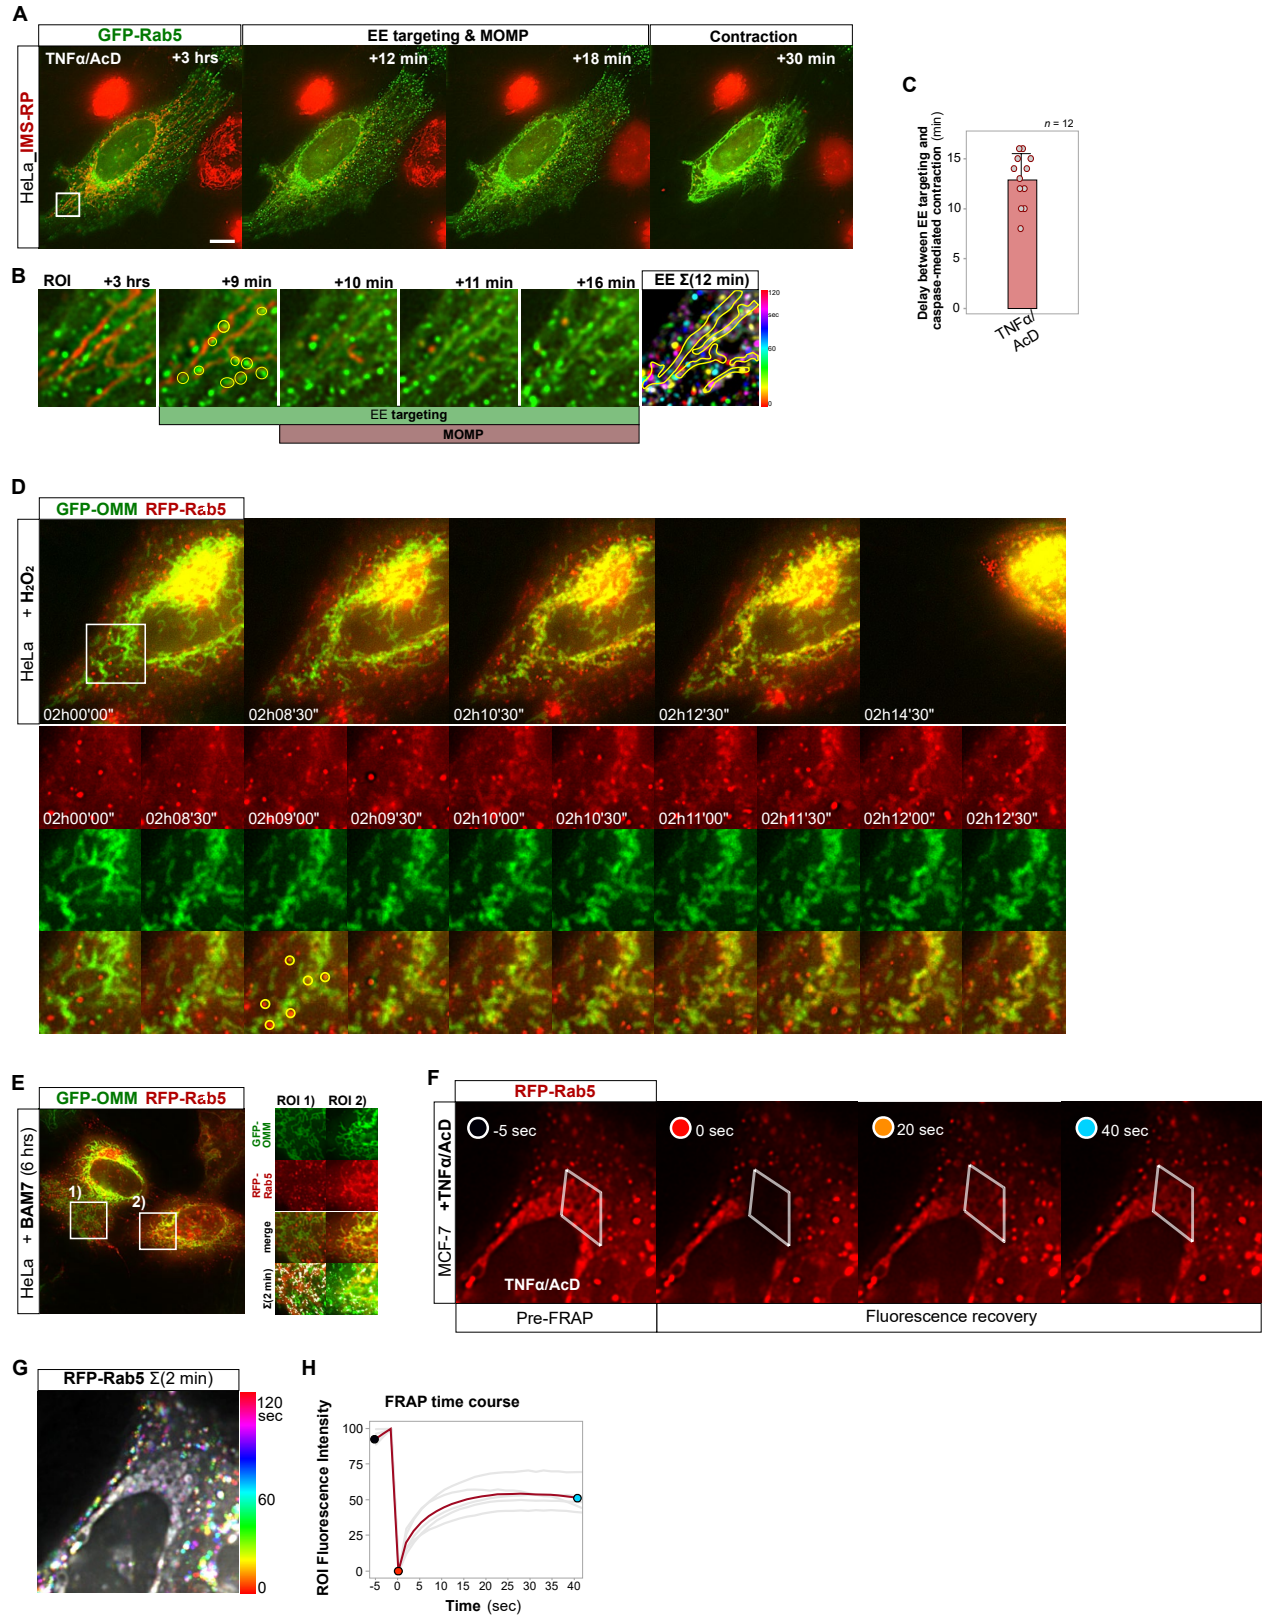

## Figure S2. Dynamics of Rab5 Targeting to Apoptotic Mitochondria, Related to Figure 2

- (A) HeLa\_IMS-RP cells, transfected with GFP-Rab5, *live* imaged, every 1 min over 1 hr starting at 3 hrs TNF $\alpha$ /AcD. Overview images at select time-points.
- (B) ROI zoom images from cell in (A). Select time-point images and color-coded time-sum image (S 12 min).
- (C) From HeLa time courses as in (A), calculated time between Rab5 mitochondrial targeting and cell contraction in HeLa\_IMS-RFP cells, treated with TNF $\alpha$ /AcD.
- (D) HeLa cell expressing GFP-OMM and RFP-Rab5 treated with 250  $\mu$ M H<sub>2</sub>O<sub>2</sub>, *live* imaged every 30 sec. Merged color overview time-series images and single and merged color ROI zooms. Rab5+ endosomes prominently interact with mitochondria, 5 min prior to contraction (yellow circles in merged color ROI, at 02h9'00").
- (E) HeLa cells expressing GFP-OMM and RFP-Rab5 treated with the small molecule BAX activator BAM7 for 6 hrs, *live* imaged every 5 sec for 2 min. Interactions between endosomes and mitochondria indicated in white. ROI 1) depicts high levels of interactions between endosomes and mitochondria. ROI 2) depicts localization of RFP-Rab5 at elongated mitochondria.
- (F) MCF-7 cells expressing RFP-Rab5, treated with TNF $\alpha$ /AcD for 6 hrs. RFP-Rab5 FRAP analysis performed in ROI. Time-series images of FRAP.
- (G) Color-coded time-step 2 min sum of post-bleach fluorescence from experiment in (F).
- (H) Graph of RFP-Rab5 FRAP from experiment in (F). Red trace, mean. Gray traces, individual cells. 5 cells analyzed.

**Figure S3**

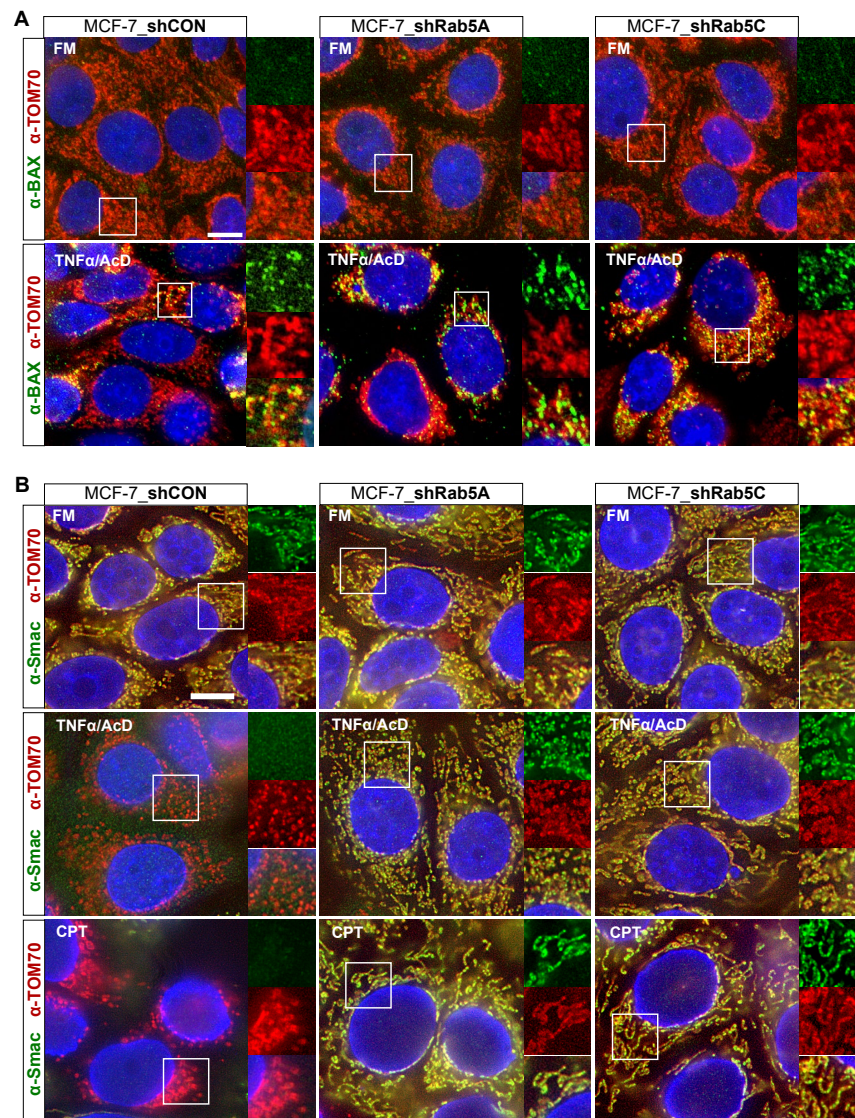

**Figure S3. Rab5 Knockdown Uncouples BAX Clustering from Smac Release, Related to Figure 4**

- (A) Representative images of MCF-7\_shCON, MCF-7\_shRab5A and MCF-7\_shRab5C cells, in full medium (FM), or treated with TNF $\alpha$ /AcD for 6 hrs. IF of BAX and TOM70, nuclei stained with Hoechst.
- (B) Representative images of MCF-7\_shCON, MCF-7\_shRab5A or MCF-7\_shRab5C cells, under full medium (FM) control conditions, or treated with TNF $\alpha$ /AcD (6 hrs) or CPT (24 hrs). IF of Smac and TOM70, nuclei stained with Hoechst.

**Figure S4**

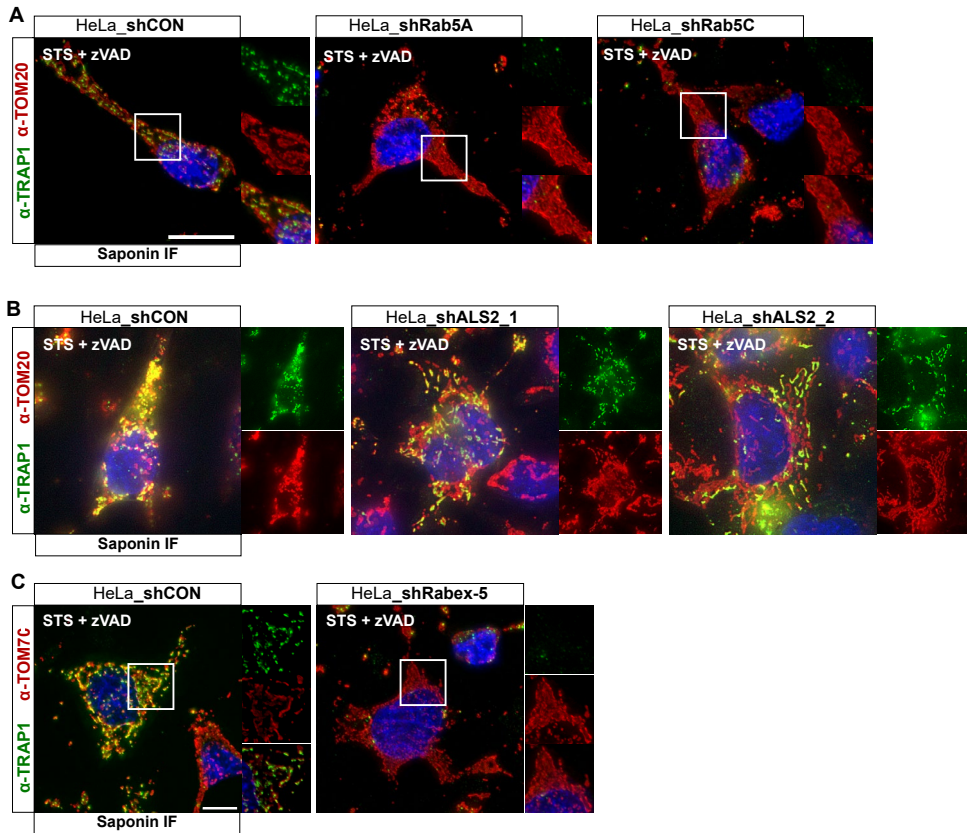

**Figure S4. Endolysosomes mediate apoptosis-related biochemical transformations of OMMs, Related to Figure 7**

- (A) HeLa\_shCON, HeLa\_shRab5A or HeLa\_shRab5C cells, treated with STS +zVAD (4 hrs). IF of saponin-permeabilized cells (saponin-IF) for TOM20 and inner-mitochondrial TRAP1.
- (B) HeLa\_shCON, HeLa\_shALS2\_1 or HeLa\_shALS2\_2 cells, treated with STS +zVAD (4 hrs). Saponin-IF of TOM20 and TRAP1.
- (C) HeLa\_shCON or HeLa\_Rabex-5 cells, treated with STS +zVAD (4 hrs). Saponin-IF of TOM20 and TRAP1.

Figure S5

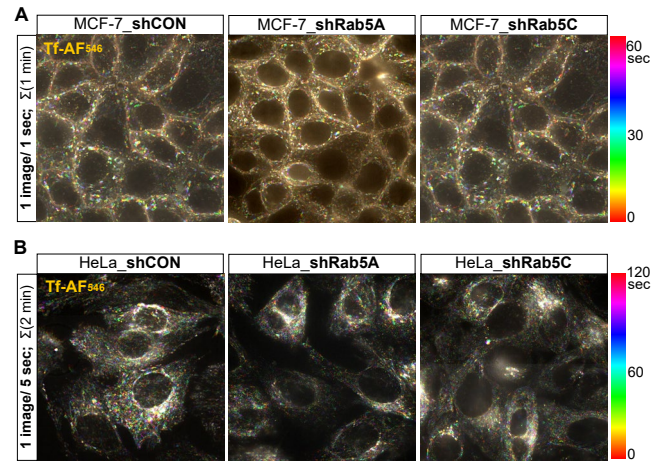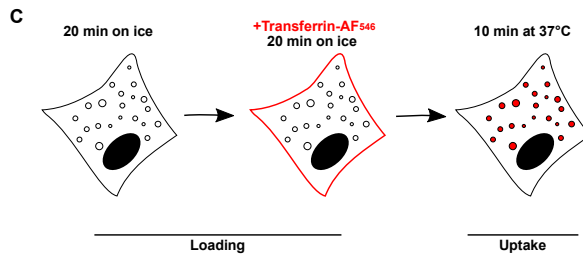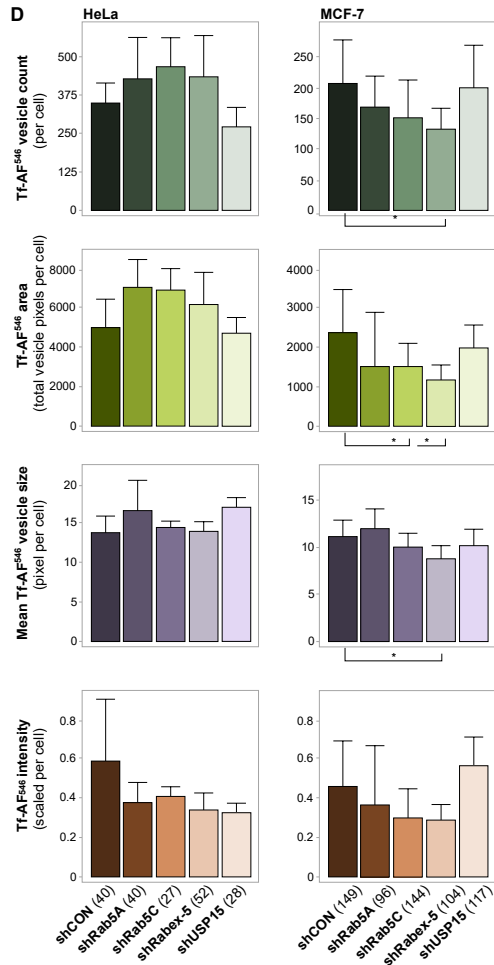



**Figure S5. Impact of Rab5A, Rab5C, USP15 or Rabex-5 Knockdown on Endocytic Trafficking of Transferrin, Related to Figure 7**

- (A) MCF-7\_shCON, MCF-7\_shRab5A and MCF-7\_shRab5C cells were loaded for 1 hr with Transferrin-AF<sup>546</sup> (Tf-AF<sup>546</sup>), and imaged in fresh medium every 1 sec for 1 min. Representative color-coded time-lapse projections of Tf-AF<sup>546</sup> fluorescence.
- (B) HeLa\_shCON, HeLa\_shRab5A and HeLa\_shRab5C cells, labeled, imaged and analyzed as in (A).
- (C) Schematic of Tf-AF<sup>546</sup> pulse-chase labeling approach.
- (D) Quantification of Tf-AF<sup>546</sup> internalization in HeLa and MCF-7 cells labeled as described in (C). Graphs display cellular average Tf-AF<sup>546</sup>+ vesicle count and size, and total area and intensity levels. The number of analyzed cells is indicated in parentheses. \* $p \leq 0.05$
